Urol Int, DOI: 10.1159/000550133

Received: July 25, 2025

Accepted: September 1, 2025

Published online: January 8, 2026

# **A Comparison of ablation therapy and partial nephrectomy for the Treatment of Renal Cell Carcinoma: A Systematic Review and Meta-analysis**

Deng R, Li Y, Zhang Z

ISSN: 0042-1138 (Print), eISSN: 1423-0399 (Online)

<https://www.karger.com/UIN>

Urologia Internationalis

## **Disclaimer:**

Accepted, unedited article not yet assigned to an issue. The statements, opinions and data contained in this publication are solely those of the individual authors and contributors and not of the publisher and the editor(s). The publisher and the editor(s) disclaim responsibility for any injury to persons or property resulting from any ideas, methods, instructions or products referred to the content.

## **Copyright:**

© 2026 S. Karger AG, Basel

# A Comparison of ablation therapy and partial nephrectomy for the Treatment of Renal Cell Carcinoma: A Systematic Review and Meta-analysis

Ran Deng<sup>a</sup>, Yunxiang Li<sup>a</sup>, Zongping Zhang<sup>a\*</sup>

<sup>a</sup> Department of Urology, Nanchong Central Hospital, The Second Clinical College, North Sichuan Medical College (University), Nanchong, 63700, Sichuan, China.

\* Correspondence: Zongping Zhang, MD, Department of Urology, Nanchong Central Hospital, The Second Clinical College, North Sichuan Medical College (University), Nanchong, 63700, Sichuan, China. (E-mail: zongping @163.com).

## Abstract

**Introduction:** Ablation therapy (AT) and partial nephrectomy (PN) are primary treatment options for renal cell carcinoma (RCC). This study aims to perform a systematic review and meta-analysis to compare the efficacy and safety of AT and PN in treating RCC.

**Methods:** This study was performed in accordance with the PRISMA guidelines. A comprehensive literature search of PubMed, Embase, Cochrane Library, and Web of Science was conducted for studies published up to February 1, 2025. Statistical analyses were performed using Stata16 software.

**Results:** A total of 32 studies involving 6030 patients were included. The analysis demonstrated that AT was associated with significantly shorter operative time (OT), less estimated blood loss (EBL), a shorter length of hospital stay (LOS), and a lower overall complication rate (CR) compared to PN. Compared with AT, PN has more advantages in OS and RFS. There were no statistically significant differences between the two interventions in cancer-specific survival (CSS).

**Conclusion:** For selected patients with RCC, AT represents a minimally invasive alternative that offers advantages over PN in perioperative outcomes, including reduced OT, EBL, LOS, and CR, while preserving renal function. However, no significant differences were found in long-term oncological survival outcomes. Keywords: ablation therapy (AT), partial nephrectomy (PN), renal cell carcinoma (RCC), meta-analysis

## Introduction

The prevalence of renal cell carcinoma (RCC) is rising at an annual rate of 3-5%, and it is estimated that approximately 140,000 fatalities per year are attributed to renal cancer[1, 2]. The therapeutic strategies for RCC encompass radical nephrectomy, partial nephrectomy(PN), and active surveillance[3]. PN serves as the primary treatment for localized RCC due to its ability to effectively preserve renal function[4]. However, for patients who are unsuitable for surgical intervention, ablation therapy (AT) has emerged as a valuable alternative. These techniques can precisely destroy tumor tissues without open surgery, offering a less invasive approach with improved patient tolerance[2].

In recent years, significant advancements have been made in AT for RCC. Technologically, AT now encompasses multiple modalities including cryoablation (CA), radiofrequency ablation (RFA), and microwave ablation (MWA)[5]. In terms of surgical access, there has been a shift from traditional laparoscopic ablation therapy (LAT) toward the less invasive percutaneous ablation therapy (PAT)[6, 7]. A recent meta-analysis involving 2,011 patients compared CA and PN for RCC and found comparable perioperative outcomes and renal function preservation between the two techniques[8]. However, another study indicated that patients selected for RFA, CA, or MWA tended to be older and have more comorbidities than those undergoing PN. Although cancer-specific survival was similar across groups, the rate of local recurrence was consistently higher after any ablative treatment compared to PN[9].

There remains considerable controversy in the current literature. Some meta-analyses are limited by an insufficient number of included studies[10], while others compare ablation technologies (such as RFA, CA, and MWA) with PN without adequately accounting for differences between ablation modalities or distinguishing between laparoscopic and percutaneous approaches[11]. Therefore, this study aims to systematically review a broad range of clinical evidence to clarify the safety and efficacy profiles of various ablation techniques, different surgical access routes, and AT in the management of RCC.

## Methods :

In February 2025, we conducted a systematic review and cumulative meta-analysis of the primary outcomes of interest. This study was performed through a comprehensive search of multiple scientific databases, adhering strictly to the PRISMA (Preferred Reporting Items for Systematic Reviews and Meta-Analyses) and AMSTAR (Assessing the Methodological Quality of Systematic Reviews) guidelines. The literature search and screening process was conducted independently by two researchers. In the event of disagreements that

could not be resolved through consensus, a third reviewer was enlisted to make the final determination. Four databases were searched: Embase, PubMed, the Cochrane Library, and Web of Science. The search strategy was designed to encompass three key concepts: (1) renal cell carcinoma, (2) ablation therapy, and (3) partial nephrectomy. These concepts were combined using the Boolean operator "AND". Within each concept, relevant Medical Subject Headings (MeSH) and Emtree terms were utilized, along with a comprehensive list of free-text terms and synonyms (e.g., "RFA", "cryoablation", "nephron-sparing surgery") connected by "OR" to maximize retrieval. The search was restricted to studies published in English. No other filters were applied. The search was restricted to studies published in English. No other filters were applied.

### **Eligibility Criteria**

The following inclusion criteria will be applied for the selection of reports to be included in our systematic review: (1) The study subjects are diagnosed with renal cancer; (2) Intervention (I): Ablation therapy(AT); (3) Comparison (C): Partial nephrectomy(PN); (4) The study includes at least one of the following outcomes: operative time (OT), length of stay (LOS), estimated blood loss (EBL), and overall survival (OS), recurrence-free survival (RFS), cancer-specific survival (CSS), estimated glomerular filtration rate(eGFR), complications, body mass index (BMI).(5)The exclusion criteria are as follows: Inability to extract relevant data; Studies presented in the form of editorials, conference proceedings, or expert opinions; Reports with overlapping study populations that present identical outcomes; Studies involving non-human subjects; Studies that do not compare AT with PN; Systematic reviews and meta-analyses were excluded from quantitative data synthesis. These publications were consulted only for background information, contextual discussion, and identification of potential primary studies that might have been missed in the initial search, but data were never extracted from them for pooling.

### **Data extraction**

Data extraction was conducted by two independent reviewers who independently selected the articles to be included and extracted data in accordance with a pre-established data collection form. The data extracted comprised the following elements: author, year of publication, sample size, age, body mass index (BMI), tumor size, operative time (OT), length of stay(LOS), estimated blood loss (EBL), complications, estimated glomerular filtration rate(eGFR), overall survive (OS) , recurrence-free survival (RFS), cancer-specific survival (CSS).

### **Study quality assessment**

The Newcastle-Ottawa Scale (NOS) was employed to evaluate the quality of retrospective studies.<sup>9</sup> The NOS scoring system is on a scale of 0 to 9, with a score exceeding 6 indicating high-quality studies.

### **Risk of bias assessment**

The evaluation of the risk of bias within the included studies was independently undertaken by the same two authors.

### **Data analysis**

For the purpose of data analysis, we utilized the Stata version 16.0 software (StataCorp LLC, 4905 Lakeway Dr., College Station, TX). In the context of our meta-analysis, the log relative risk (RR) along with its variance was employed as the summary outcome measure to synthesize information from all the trials under consideration. Specifically, for each individual trial, we calculated the hazard ratio and its corresponding 95% confidence interval (CI) for the survival rate. The choice between the fixed-effects model and the random-effects model was made based on the specific characteristics and data structure of each trial.

### **Statistical Analysis**

The threshold for statistical significance was set at  $p < 0.05$ . WMD represented continuous variables, OR/RR represented dichotomous variables, and 95% confidence intervals (95% CI) were calculated. To assess the heterogeneity among the included studies, heterogeneity was assessed using the Q-test and the  $I^2$  statistic. If the  $I^2$  statistic exceeded 50% or the p-value was less than 0.10, it was interpreted as an indication of significant heterogeneity between the studies.

## **Results**

### **Description of study**

The authors conducted a comprehensive search across four databases, yielding a total of 680 records. Utilizing Endnote software, they identified and removed 298 duplicate studies. A further 248 studies were excluded after reviewing their titles and abstracts. Additionally, 44 studies could not be retrieved, 32 were systematic reviews, 18 did not meet the inclusion criteria, and 8 were excluded due to incomplete data. Ultimately, 32 studies involving 6030 patients were included in this meta-analysis. The sample sizes of these

studies ranged from 27 to 2276. All 32 studies were retrospective in nature. The screening process is illustrated in Figure 1, while the baseline characteristics of the included studies are detailed in Table 1. The 32 publications were released between the years 2007 and 2025. The PRISMA checklist is included in the supplementary document.

### Quality assessment

The quality assessment of the cohort studies was performed utilizing the modified Newcastle-Ottawa Scale (NOS), with the scores ranging from 6 to 8 points. A total of 32 studies were incorporated into this evaluation, and each of them achieved a score of at least six, as detailed in Table 2.

### Operative time (OT)

A total of 18 studies reported on the outcome of operative time (OT)[12-22,26-28,39-41,43]. Given the presence of substantial heterogeneity among these studies ( $I^2 = 97.9\%$ ,  $p = 0.000$ ), a random-effects model was employed for the meta-analysis. The pooled analysis revealed a significant difference between the groups with partial nephrectomy (PN) and ablation therapy (AT) (WMD=76.70, 95% CI [51.50 to 101.90],  $p < 0.05$ ,  $I^2 = 97.9\%$ ) (Fig. 2). PN is inherently more complex, leading to significantly longer OT compared to AT[30]. However, ablative technologies are continually advancing. In this study, we conducted subgroup analyses to compare different ablative methods (RFA, CA, MWA) and surgical approaches (laparoscopic ablative therapy (LAT) and percutaneous ablative therapy (PAT)).

Subgroup analyses were conducted by the authors based on different ablative technologies. The pooled meta-analysis revealed a significant difference between PN and different AT (Fig. 3). The 5 studies [12-16]show that the OT for PN is longer than that for Radiofrequency ablation (RAF) (WMD=62.16, 95% CI [12.72 to 111.61],  $p < 0.05$ ,  $I^2 = 96.4\%$ ).

The 5 results showed[15, 18-21,] that the OT of PN was longer than Microwave ablation (MWA) (WMD = 78.30, 95%CI [30.99,125.60],  $P < 0.05$ ). High heterogeneity between studies ( $I^2 = 56.1\%$ ,  $p < 0.05$ ,  $I^2 = 98.8\%$ ) (Fig. 3).

The 5 results [26-27,39-41]showed that the OT of PN was longer than Cryoablation (CA) (WMD = 83.99, 95%CI [8.2,159.78],  $P < 0.05$ ,  $I^2 = 98.6\%$ ). (Fig. 3).

Subgroup analyses were conducted by the authors based on different surgical approaches (laparoscopic ablative therapy (LAT) and percutaneous ablative therapy (PAT)). The pooled meta-analysis revealed a significant difference between PN and different surgical approaches of AT. (Fig. 4). The 15 studies [12-14,16-19,22,26-28,39-41,43]involving LAT and PAT have confirmed that the OT of AT is shorter compared to PN. LAT had a shorter OT compared to PN (WMD=62.28, 95% CI [30.78 to 99.79],  $p < 0.05$ ,  $I^2 = 95.7\%$ ). Additionally, another 7 studies also showed a significant difference in OT between PAT and PN (WMD=82.71, 95% CI [51.81 to 113.62],  $p < 0.05$ , 96.6%).

### Length of stay (LOS, days)

A total of 26 studies [12-22, 26-28, 31-41,43]reported the length of stay (LOS). The pooled meta-analysis indicated significant difference in LOS between PN and AT (WMD= 2.01, 95% CI [1.55 to 2.47],  $p < 0.05$ ,  $I^2 = 91.0\%$ ) as illustrated in Fig 5. Our findings suggest that AT is associated with shorter LOS compared to PN. This is likely due to the reduced trauma and quicker postoperative recovery associated with AT. To elucidate the differences in LOS across different ablative methods and surgical approaches, we conducted subgroup analyses.

The 10 results [12-14, 16, 17, 20, 31-34]showed that the LOS of PN was longer than RAF (WMD = 2.25, 95%CI [1.68,2.82],  $P < 0.05$ ,  $I^2 = 84.5\%$ ) (Fig 6)

The 4 results[15, 18-19, 21] showed that the LOS of PN was longer than MWA (WMD =3.66, 95%CI [1.26,6.07],  $P < 0.05$ ,  $I^2 = 88.6\%$ ) (Fig 6).

The 7 results [26-27, 37-41]showed that the LOS of PN was longer than CA (WMD = 1.48, 95%CI [0.81,2.15],  $P < 0.05$ ,  $I^2 = 77.0\%$ ) (Fig 6).

The 25 studies [12-14,16-22, 26-28, 31-41,43] involving LAT and PAT have confirmed that the LOS of AT is shorter compared to PN (Fig 7). There was high heterogeneity among the eleven studies, which showed that LAT had a shorter LOS compared to PN (WMD=1.53, 95% CI [0.98 to 2.07],  $p < 0.05$ ,  $I^2 = 78.9\%$ ). Additionally, another 14 studies also showed a significant difference in LOS between PAT and PN (WMD=2.25, 95% CI [1.52 to 2.98],  $p < 0.05$ ,  $I^2 = 93.8\%$ ).

### Estimated blood loss (EBL, ml)



A total of 9 studies[12-15, 18, 27, 38-41] reported the EBL (Estimated blood loss (EBL, ml). The results showed that PN had more EBL (WMD= 112.7, 95% CI [69.12 to 156.28],  $p < 0.05$ ,  $I^2 = 90.0\%$ ), as illustrated in Fig 8.

#### **Estimated glomerular filtration rate (eGFR)**

The 10 studies reported [14-16, 18-19, 27, 31, 33-36] the Estimated glomerular filtration rate (eGFR), a key indicator of renal function. The pooled meta-analysis indicated that compared with AT, the estimated glomerular filtration rate (eGFR) declines more rapidly after PN (WMD= 3.71, 95% CI [1.29 to 6.13],  $p > 0.05$ ,  $I^2 = 83.7\%$ ), as illustrated in Fig 9.

#### **Overall complication rate (OCR)**

The 17 studies[12-15,17, 20-22, 28,32-33, 37-40, 44] reported the Overall complication rate (OCR). Results showed that significant difference in OCR between PN and AT (OR=1.70 95% CI [1.13 to 2.55],  $p < 0.05$ ,  $I^2 = 41.1\%$ ) (Fig 10).

#### **Major complication rate (MCR)**

A total of 19 studies[13-18, 17, 20-21, 26,28,33, 35-36, 39-41,43-45] reported the Major complication rate (MCR) of PN vs AT. Results showed that difference in MCR between PN and AT (OR=1.73, 95% CI [1.10 to 2.74],  $p > 0.05$ ,  $I^2 = 0.0\%$ ) (Fig 11).

To explore the differences in MCR between different ablative methods and surgical approaches of AT versus PN, we conducted subgroup analyses. These seven findings show no significant difference in MCR between PN and RAF (OR = 1.78, 95%CI [0.63,4.99],  $P > 0.05$ ,  $I^2 = 32.1\%$ ) (Fig 12). The 4 results show significant difference in MCR between PN and MWA (OR = 3.19, 95%CI [1.19,8.57],  $P < 0.05$ ,  $I^2 = 0.0\%$ ) (Fig 12). The 5 results indicated that the MCR of PN was not significantly different from that of CA (OR = 1.04, 95%CI [0.48,2.23],  $P > 0.05$ ,  $I^2 = 0.0\%$ ) (Fig 12).

The 18 studies [13-18,20-21,26,28,33,35-36,39-41,43-45] involving LAT and PAT have confirmed that the MCR of AT is not significantly different from that of PN. (Fig 13). The 8 studies show significant difference in MCR between PN and LAT(OR=1.98, 95% CI [1.09 to 3.62],  $p > 0.05$ ,  $I^2 = 31.6\%$ ). Additionally, another 10 studies also showed significant difference in MCR between PAT and PN (OR=2.05, 95% CI [1.06 to 3.94],  $p > 0.05$ ,  $I^2 = 0.0\%$ ).

#### **Overall survival (OS)**

The 10 studies [7, 14, 18,19, 22,26, 27, 34, 45, 46]reported overall survival (OS) of AT vs PN. Results showed that significant difference in OS between PN and AT (OR=1.37, 95% CI [1.13 to 1.66],  $p > 0.05$ ,  $I^2 = 34.7\%$ ) (Fig 14).

This study performed subgroup analyses stratified by the different ablative methods, providing a clearer illustration of the OS differences between each ablation and PN. The 3 studies demonstrated that there was significant difference in OS between PN and RAF. (OR = 1.69, 95%CI [1.29,2.22],  $P > 0.05$ ,  $I^2 = 0.0\%$ ) (Fig 15). The 3 studies demonstrated that there was no significant difference in OS between PN and MWA. (OR = 1.19, 95%CI [0.95,1.51],  $P > 0.05$ ,  $I^2 = 43.8\%$ ), (Fig 15).

The 4 studies demonstrated that there was significant difference in OS between PN and CA. (OR = 1.32, 95%CI [0.68,2.58],  $P > 0.05$ ,  $I^2 = 0.0\%$ ) (Fig 15).

Our analysis indicates that the AT group does not have an advantage over the PN group in terms of OS. We anticipate that future well-designed clinical studies will provide more compelling evidence.

#### **Recurrence-free survival (RFS)**

RFS is an essential time-to-event endpoint for assessing tumor treatment efficacy and prognosis, offering vital evidence for clinical decision-making and research design. Our pooled analysis of 15 included studies showed significant difference RFS between the PN and AT[7,14,15,18,22, 26,27,33, 34, 44-49]. (OR=1.32, 95% CI [1.09 to 1.58],  $p > 0.05$ ,  $I^2 = 0.0\%$ ) (Fig 16).

This study performed subgroup analyses stratified by the different ablative methods. The 5 studies demonstrated that there was no significant difference in RFS between RAF and PN. (OR = 1.27, 95%CI [0.69,2.23],  $P > 0.05$ ,  $I^2 = 0.0\%$ ) (Fig 17).The 4 studies demonstrated that there was no significant difference in RFS between PN and MWA. (OR = 1.56, 95%CI [0.75,3.23],  $P > 0.05$ ,  $I^2 = 57.8\%$ ) (Fig 17). The 4 studies demonstrated that there was significant difference in RFS between PN and CA. (OR = 1.52, 95%CI [1.03,2.24],  $P > 0.05$ ,  $I^2 = 0.0\%$ ) (Fig 17).

This study performed subgroup analyses stratified by the different surgical approaches. LAT was reported in 2 studies. The pooled meta-analysis demonstrated no significant difference in RFS between PN and LAT

(OR= 0.92, 95% CI [0.28 to 3.07],  $p > 0.05$ ,  $I^2 = 0.0\%$ ) (Fig 18). PAT was reported in 9 studies. The pooled meta-analysis demonstrated significant difference in RFS between PN and PAT (OR= 1.45, 95% CI [1.11 to 1.90],  $p < 0.05$ ,  $I^2 = 19.8\%$ ) (Fig 18).

### Cancer-specific survival (CSS)

The 6 studies [7,14,18,22,26,27] reported cancer-specific survival (CSS) of PN vs AT. Results showed that no significant difference in CSS between PN and AT (OR=1.37, 95% CI [0.75 to 2.50],  $p > 0.05$ ,  $I^2 = 0.0\%$ ) (Fig 19).

Our meta-analysis of 32 studies revealed that patients undergoing PN experienced longer OT, prolonged LOS, higher CR, and greater declines in postoperative eGFR. However, our analysis indicates that the AT group does not have an advantage over the PN group in terms of OS and RFS. These findings underscore the need for additional well-designed, high-quality studies to confirm these conclusions.

### Discussion

The incidence of RCC continues to rise annually[1, 2]. Currently, nephron-sparing PN remains the standard treatment for small RCC[50]; nevertheless, AT represents a viable alternative for patients who are unable to tolerate PN[50-52].

Our results demonstrate that AT offers significant advantages in several short-term outcomes. Specifically, AT was associated with shorter OT, reduced LOS, lower EBL, and better preservation of renal function, as reflected by higher postoperative eGFR. These benefits are consistent with the minimally invasive nature of AT, which avoids the complex dissection and reconstruction often required in PN [28,51]. However, this advantage did not extend to long-term oncological outcomes.

A notable finding of this study is the considerable heterogeneity observed across multiple outcome measures, such as OT ( $I^2 = 97.9\%$ ) and LOS ( $I^2 = 91.0\%$ ). This variability likely arises from differences in surgical expertise, institutional protocols, patient selection criteria, and technological evolution over the study period[30]. Unlike previous meta-analyses [53, 54], this study conducted detailed subgroup analyses not only across ablation modalities (RFA, MWA, CA) but also between surgical approaches (laparoscopic vs. percutaneous). These analyses consistently demonstrated that AT—regardless of technique or access—was associated with shorter OT compared to PN. This difference likely stems from the inherently more complex nature of PN, which often requires renal vascular control and parenchymal reconstruction, whereas AT involves minimally invasive tissue destruction without the need for extensive dissection [28,51].

The superior renal functional outcomes associated with AT are particularly noteworthy. The smaller decline in eGFR following AT is likely attributable to its tissue-preserving mechanism, which selectively destroys tumor tissue while minimizing damage to adjacent healthy parenchyma[55]. In contrast, PN inevitably removes a margin of normal kidney tissue, which may impair renal function to a greater extent[56].

Nevertheless, the clinical significance of this difference remains uncertain due to significant heterogeneity ( $I^2 = 83.7\%$ ) and the limited number of studies reporting functional outcomes.

With regard to safety, our analysis revealed that PN did not offer advantages in terms of overall complications or major complications. This aligns with previous reports indicating that AT is a safe procedure with a morbidity profile comparable to that of surgery [57, 58]. Subgroup analyses further revealed no significant differences when AT modalities or approaches were considered separately, reinforcing the general safety of ablative techniques. However, variations in complication definitions and reporting standards across studies may have introduced additional heterogeneity, limiting the strength of this conclusion.

In the AT group, significant differences were observed in OS and RFS; nevertheless, these results must be interpreted with caution. The data suggest that AT is effective in controlling cancer-specific mortality, yet they may also reflect disparities in baseline patient characteristics—such as age and comorbidity burden—or technical factors including the completeness of ablation and the management of recurrences [59]. Notably, in contrast to earlier reports, a single-center study encompassing 1,798 patients demonstrated longer CSS with PCA than with PN, underscoring the potential influence of evolving surgical techniques[7]. Another recent retrospective study analysis also indicates that the risk of surgical-related complications for CA is extremely low[60]. These findings emphasize the imperative for meticulous patient selection and the establishment of standardized procedural protocols to optimize oncological outcomes.

Several limitations must be acknowledged. First, the predominance of retrospective studies introduces potential selection and reporting biases. Second, the high and largely unexplained heterogeneity across outcomes limits the robustness of our conclusions. Third, publication bias was not assessed, which may

affect the validity of the results. Finally, rapid advancements in ablative technology mean that older studies may not reflect current practice.

## Conclusion

In summary, AT demonstrates clear advantages over PN in perioperative and functional outcomes, supporting its role as a less invasive alternative for managing small renal masses. However, its association with inferior OS and RFS highlights the need for careful patient selection and long-term monitoring. Future prospective, well-designed studies are essential to better define the role of AT, standardize its application, and evaluate its long-term efficacy relative to surgical standards.

## Abbreviations

LOS = length of stay    eGFR = Estimated glomerular filtration rate

OPN = open partial nephrectomy    OT= operative time

PN = partial nephrectomy    PAT = percutaneous ablative therapy

RCC = renal cell carcinoma    EBL = estimated blood loss

LPN = laparoscopic partial nephrectomy    AT= ablation therapy

PN = partial nephrectomy    CR = complication rates

OS = overall survival    RFS = recurrence-free survival.

CSS = cancer - specific survival    CA = cryoablation

RFA = radiofrequency ablation    MWA = microwave ablation (MWA) LAT = laparoscopic ablative therapy

## Acknowledgments

The original studies included in this meta-analysis were ethically reviewed. The author thanks Professor Zongping Zhang for his continued support and encouragement.

## Statement of Ethics

A Statement of ethics and consent to participate is not applicable because this study is based exclusively on published literature.

## Conflict of Interest Statement

There are no conflicts of interest involved in this study.

## Funding Sources

Zongping Zhang presided over the “Ten Thousand People Plan of Guozhou (ZX-W2201-4)” fund in Guizhou. Not only did he cover the expenses for article publication, but he also participated in the design and revision

## Authors' contributions

Ran Deng and Yunxiang Li participated in data analysis and validation. Zongping Zhang secured the funding for the research.

## A Data Availability Statement

The materials used in this study are openly available and can be accessed at Pubmed, Embase, Cochran, and Web of Science databases

## References

1. Zhuolun S, Tengcheng L, Chutian X, Shaozhong Z, Mingxiao Z, Qiwei Z, Zhenqing W, Hailun Z, Hua W: **Prediction of overall survival based upon a new ferroptosis-related gene signature in patients with clear cell renal cell carcinoma.** *World J Surg Oncol* 2022, **20**(1).
2. Michael L, Ian M M, Kenneth G N, Yousef Z, Saum G, Vignesh T P: **Management of Renal Cell Carcinoma With Supradiaphragmatic Inferior Vena Cava Thrombus Diagnosed During Acute COVID-19 Infection.** *Cureus* 2024, **16**(3).
3. O A P, P M, A G M, M Yu G, N A G, P S K, D A A: **[Comparative analysis of clinical features of robotic-assisted and laparoscopic partial nephrectomy].** *Urologiia* 2021(3).
4. Kenichi N, Yuichiro S, Naoya S, Keisuke F, Kanae K, Terutaka N, Tetsuya F, Noriyoshi M, Yuki M, Tadahiko K *et al*: **A low RENAL Nephrometry Score can avoid the need for the intraoperative insertion of a ureteral catheter in robot-assisted partial nephrectomy.** *World J Surg Oncol* 2021, **19**(1).
5. Si G, Zuoping W, Yunxiang L, Lei Z, Lijian G, Zhiqiang Z, Chunyang M, Kangsen L, Jiakai M, Deyu W *et al*: **Is Ablation Suitable For Small Renal Masses? A Meta-Analysis.** *Acad Radiol* 2024, **32**(1).
6. S P S, R P K, I H D: **Laparoscopic and percutaneous cryotherapy for renal neoplasms.** *Panminerva Med* 2010, **52**(4).

7. Jack R A, Thomas A, Grant S, Christine M L, A Nicholas K, Adam W, Matthew R C, John C C, Stephen A B, Bradley C L *et al*: **Oncologic Outcomes Following Partial Nephrectomy and Percutaneous Ablation for cT1 Renal Masses**. *Eur Urol* 2019, **76**(2).
8. HuiYu G, Lin Z, JiaBin Z, Qiang W, ZiYuan L, Qian X, Ying T, Hui S, JunJie Z, Xiang C *et al*: **Comparative efficacy of cryoablation versus robot-assisted partial nephrectomy in the treatment of cT1 renal tumors: a systematic review and meta-analysis**. *BMC Cancer* 2024, **24**(1).
9. Johannes U, Arne S, Gerta R, Ali SAH, Joachim L, Lutz T, Hyun S K, Annemarie U: **Partial nephrectomy versus ablative techniques for small renal masses: a systematic review and network meta-analysis**. *Eur Radiol* 2018, **29**(3).
10. Wu D, Lu Y, Liu Y, Lin D: **A systematic review and meta-analysis of laparoscopic partial nephrectomy versus laparoscopic focal therapy for small renal masses**. *Medicine (Baltimore)* 2025, **104**(33).
11. Hans-Jonas M, Timo Christian M, Manuel Florian S, Silke Z: **Efficacy and safety of percutaneous thermal ablation in Bosniak III and IV cystic renal masses: a systematic review and meta-analysis**. *Diagn Interv Radiol* 2025(0).
12. Karim B, Ilia Z, Altug T, Jeffrey C, Yair L: **Evaluation of costs and morbidity associated with laparoscopic radiofrequency ablation and laparoscopic partial nephrectomy for treating small renal tumours**. *BJU Int* 2007, **101**(4).
13. Jiwei H, Jin Z, Yanqing W, Wen K, Wei X, Dongming L, Yonghui C, Yiran H: **Comparing Zero Ischemia Laparoscopic Radio Frequency Ablation Assisted Tumor Enucleation and Laparoscopic Partial Nephrectomy for Clinical T1a Renal Tumor: A Randomized Clinical Trial**. *J Urol* 2016, **195**(6).
14. Changwei J, Xiaozhi Z, Shiwei Z, Guangxiang L, Xiaogong L, Gutian Z, Andrea M, Hongqian G: **Laparoscopic Radiofrequency Ablation versus Partial Nephrectomy for cT1a Renal Tumors: Long-Term Outcome of 179 Patients**. *Urol Int* 2016, **96**(3).
15. Wei G, Jian B, Jihong L, Shaogang W, Qianyuan Z, Zhangqun Y, Zhiquan H: **Microwave ablation versus partial nephrectomy for small renal tumors: intermediate-term results**. *J Surg Oncol* 2012, **106**(3).
16. Jong Mok P, Seung Woo Y, Ju Hyun S, Yong Gil N, Ki Hak S, Jae Sung L: **Oncological and Functional Outcomes of Laparoscopic Radiofrequency Ablation and Partial Nephrectomy for T1a Renal Masses: A Retrospective Single-center 60 Month Follow-up Cohort Study**. *Urol J* 2018, **16**(1).
17. Vanessa AR, Sam L, Einar B, Michael H, Maria L, Lisa W, Anders M: **Periprocedural outcome after laparoscopic partial nephrectomy versus radiofrequency ablation for T1 renal tumors: a modified R.E.N.A.L nephrometry score adjusted comparison**. *Acta Radiol* 2018, **60**(2).
18. Jie Y, Ping L, Xiao-ling Y, Zhi-gang C, Zhi-yu H, Xu Z, Jun D, Meng-juan M, Xin L, Xiao-hui W: **US-guided percutaneous microwave ablation versus open radical nephrectomy for small renal cell carcinoma: intermediate-term results**. *Radiology* 2014, **270**(3).
19. Marius A, Giedrė A, Gintarė A, Arminas S: **Microwave Thermal Ablation versus Open Partial Nephrectomy for the Treatment of Small Renal Tumors in Patients Over 70 Years Old**. *Medicina (Kaunas)* 2019, **55**(10).
20. Gianpaolo L, Elisa DL, Anna Maria I, Carlo S, Andrea M, Marco N, Giancarlo A, Gianpaolo C, Emanuele M, Luca B: **Perioperative and Survival Outcomes of Patients Treated With Robot-Assisted Partial Nephrectomy and Percutaneous Microwave Ablation for Small Renal Masses: A Single Center Experience**. *Clin Genitourin Cancer* 2023, **22**(2).
21. Osman K, Yeliz A, Hakkı Mete Ç, Atınç T, Burak G, Burak A, Selçuk K, Gökhan K, Serdar S, Fethi Emre U *et al*: **Comparison of the Efficacy of Percutaneous Microwave Ablation Therapy versus Laparoscopic Partial Nephrectomy for Early-Stage Renal Tumors**. *Diagnostics (Basel)* 2024, **14**(14).
22. Raphaël L, Francois C, Jean-Christophe B, Pierre B, Cécile C, Franck B, Morgan R, Nicolas D, Charles-Karim B, Jonathan O *et al*: **Minimally invasive nephron-sparing treatments for T1 renal cell cancer in patients over 75 years: a comparison of outcomes after robot-assisted partial nephrectomy and percutaneous ablation**. *Eur Radiol* 2023, **33**(12).
23. Hui-Ying L, Chih Hsiung K, Hung-Jen W, Chien Hsu C, Hao Lun L, Yen-Ta C, Yuan-Tso C, Po-Hui C: **Comparison of Robot-Assisted Laparoscopic Partial Nephrectomy with Laparoscopic Cryoablation in the Treatment of Localised Renal Tumours: A Propensity Score-Matched Comparison of Long-Term Outcomes**. *Diagnostics (Basel)* 2021, **11**(5).

24. Rebecca L OM, Aaron D B, Jamie A K, Courtney K P, Michael S, Samir S T: **A matched-cohort comparison of laparoscopic cryoablation and laparoscopic partial nephrectomy for treating renal masses.** *BJU Int* 2006, **99**(2).
25. Julien G, Georges-Pascal H, Riccardo A, Ranko M, Shahab H, Adrian H, Humberto L, Rachid Y, Wahib I, Jean-Alexandre L *et al*: **Robotic partial nephrectomy versus laparoscopic cryoablation for the small renal mass.** *Eur Urol* 2012, **61**(5).
26. Takafumi Y, Jun M, Kanichiro S, Wataru F, Fumihiko U, Keiichiro M, Hiroshi S, Takahiro K, Kenta M, Shin E: **Functional and oncological outcome of percutaneous cryoablation versus laparoscopic partial nephrectomy for clinical T1 renal tumors: A propensity score-matched analysis.** *Urol Oncol* 2020, **38**(12).
27. Georges-Pascal H, Michael C L, Sebastien C, Kazumi K, Inderbir S G: **Tumour in solitary kidney: laparoscopic partial nephrectomy vs laparoscopic cryoablation.** *BJU Int* 2011, **109**(1).
28. Savio Domenico P, Davide L, Alp T B, Ithaar D, Antonio C, Lorenzo B, Jeffrey E, Giovanni C, Umberto C, Giuseppe L *et al*: **Percutaneous thermal ablation for cT1 renal mass in solitary kidney: A multicenter trifecta comparative analysis versus robot-assisted partial nephrectomy.** *Eur J Surg Oncol* 2022, **49**(2).
29. Jie Y, Xu Z, Hong L, Ruiming Z, Xiaoling Y, Zhigang C, Zhiyu H, Fangyi L, Guoliang H, Meng-Juan M *et al*: **Percutaneous Microwave Ablation versus Laparoscopic Partial Nephrectomy for cT1a Renal Cell Carcinoma: A Propensity-matched Cohort Study of 1955 Patients.** *Radiology* 2020, **294**(3).
30. Xuezhi L, Xiaoqin D, Yubo W, Qiuxia Q, Jianhao W, Yueting H, Zhipeng W, Binghao Z, Jianfeng L, Yanchun P *et al*: **Evidence-based practice and future development of enhanced recovery after surgery (ERAS) in urology: a multidimensional assessment based on the GRADE system.** *J Robot Surg* 2025, **19**(1).
31. Kim S, Lee E, Kim H, Kwak C, Ku J, Lee S, Hong S, Jeong C, Kim S, Cho J *et al*: **A propensity-matched comparison of perioperative complications and of chronic kidney disease between robot-assisted laparoscopic partial nephrectomy and radiofrequency ablative therapy.** *Asian journal of surgery* 2015, **38**(3):126-133.
32. Chung D, Hwang H, Sohn D: **Radiofrequency ablation using real-time ultrasonography-computed tomography fusion imaging improves treatment outcomes for T1a renal cell carcinoma: Comparison with laparoscopic partial nephrectomy.** *Investigative and clinical urology* 2022, **63**(2):159-167.
33. Pantelidou M, Challacombe B, McGrath A, Brown M, Ilyas S, Katsanos K, Adam A: **Percutaneous Radiofrequency Ablation Versus Robotic-Assisted Partial Nephrectomy for the Treatment of Small Renal Cell Carcinoma.** *Cardiovascular and interventional radiology* 2016, **39**(11):1595-1603.
34. Pedraza-Sánchez JP, Chaves-Marcos R, Mazuecos-Quirós J, Bisonó-Castillo Á L, Osmañ-García I, Gutiérrez-Marín CM, Medina López RA, Juárez Soto Á: **Percutaneous radiofrequency ablation is an effective treatment option for small renal masses, comparable to partial nephrectomy.** *Eur Radiol* 2023, **33**(11):7371-7379.
35. Klein C, Cazalas G, Margue G, Piana G, E DEK, Gangi A, Puech P, Nedelcu C, Grange R, Buy X *et al*: **Percutaneous tumor ablation versus image guided robotic-assisted partial nephrectomy for cT1b renal cell carcinoma: a comparative matched-pair analysis (UroCCR 80).** *Minerva Urol Nephrol* 2023, **75**(5):559-568.
36. Cazalas G, Klein C, Piana G, De Kerviler E, Gangi A, Puech P, Nedelcu C, Grange R, Buy X, Jegondy MA *et al*: **A multicenter comparative matched-pair analysis of percutaneous tumor ablation and robotic-assisted partial nephrectomy of T1b renal cell carcinoma (AblatT1b study-UroCCR 80).** *Eur Radiol* 2023, **33**(9):6513-6521.
37. Haramis G, Graversen JA, Mues AC, Korets R, Rosales JC, Okhunov Z, Badani KK, Gupta M, Landman J: **Retrospective comparison of laparoscopic partial nephrectomy versus laparoscopic renal cryoablation for small (<3.5 cm) cortical renal masses.** *J Laparoendosc Adv Surg Tech A* 2012, **22**(2):152-157.
38. Lin YC, Turna B, Frota R, Aron M, Haber GP, Kamoi K, Koenig P, Gill IS: **Laparoscopic partial nephrectomy versus laparoscopic cryoablation for multiple ipsilateral renal tumors.** *Eur Urol* 2008, **53**(6):1210-1216.
39. Liu HY, Kang CH, Wang HJ, Chen CH, Luo HL, Chen YT, Cheng YT, Chiang PH: **Comparison of Robot-Assisted Laparoscopic Partial Nephrectomy with Laparoscopic Cryoablation in the Treatment of**

## **Localised Renal Tumours: A Propensity Score-Matched Comparison of Long-Term Outcomes.**

*Diagnostics (Basel)* 2021, **11**(5).

40. O'Malley RL, Berger AD, Kanofsky JA, Phillips CK, Stifelman M, Taneja SS: **A matched-cohort comparison of laparoscopic cryoablation and laparoscopic partial nephrectomy for treating renal masses.** *BJU Int* 2007, **99**(2):395-398.
41. Guillotreau J, Haber GP, Autorino R, Miocinovic R, Hillyer S, Hernandez A, Laydner H, Yakoubi R, Isac W, Long JA *et al*: **Robotic partial nephrectomy versus laparoscopic cryoablation for the small renal mass.** *Eur Urol* 2012, **61**(5):899-904.
42. Yanagisawa T, Miki J, Shimizu K, Fukuokaya W, Urabe F, Mori K, Sasaki H, Kimura T, Miki K, Egawa S: **Functional and oncological outcome of percutaneous cryoablation versus laparoscopic partial nephrectomy for clinical T1 renal tumors: A propensity score-matched analysis.** *Urol Oncol* 2020, **38**(12):938.e931-938.e937.
43. Pandolfo SD, Loizzo D, Beksac AT, Derweesh I, Celia A, Bianchi L, Elbich J, Costa G, Carbonara U, Lucarelli G *et al*: **Percutaneous thermal ablation for cT1 renal mass in solitary kidney: A multicenter trifecta comparative analysis versus robot-assisted partial nephrectomy.** *Eur J Surg Oncol* 2023, **49**(2):486-490.
44. Joshua M S, Robert S, Sangtae P, Michael H, Yair L, Arthur I S, Jeffrey A C: **Intermediate comparison of partial nephrectomy and radiofrequency ablation for clinical T1a renal tumours.** *BJU Int* 2007, **100**(2).
45. Uemura T, Kato T, Nagahara A, Kawashima A, Hatano K, Ujike T, Ono Y, Higashihara H, Fujita K, Fukuhara S *et al*: **Therapeutic and Clinical Outcomes of Robot-assisted Partial Nephrectomy Versus Cryoablation for T1 Renal Cell Carcinoma.** *In Vivo* 2021, **35**(3):1573-1579.
46. David-Dimitris C, Zisis K, Evgenia E, Napoleon M, Nikolaos K, Michail C, Konstandinos S, Dimitris K F: **Percutaneous Microwave Ablation Versus Robot-Assisted Partial Nephrectomy for Stage I Renal Cell Carcinoma: A Propensity-Matched Cohort Study Focusing Upon Long-Term Follow-Up of Oncologic Outcomes.** *Cardiovasc Intervent Radiol* 2024, **47**(5).
47. Qiu J, Ballantyne C, Lange M, Kennady E, Yeaman C, Culp S, Schenkman N, Lobo JM: **Comparison of microwave ablation and partial nephrectomy for T1a small renal masses.** *Urol Oncol* 2023, **41**(10):434.e439-434.e416.
48. Fraisse G, Colleter L, Peyronnet B, Khene ZE, Mandoorah Q, Soorojebally Y, Bourgi A, De La Taille A, Roupret M, De Kerviler E *et al*: **Peri-operative and local control outcomes of robot-assisted partial nephrectomy vs percutaneous cryoablation for renal masses: comparison after matching on radiological stage and renal score.** *BJU Int* 2019, **123**(4):632-638.
49. Millan B, Breau RH, Bhindi B, Mallick R, Tanguay S, Finelli A, Lavallée LT, Pouliot F, Rendon R, So Al *et al*: **A Comparison of Percutaneous Ablation Therapy to Partial Nephrectomy for cT1a Renal Cancers: Results from the Canadian Kidney Cancer Information System.** *J Urol* 2022, **208**(4):804-812.
50. Alessandro A, Vincenzo F, Roberto B, Marco C, Giorgio C, Serena C, Nicola L, Giuseppe M, Andrea M, Vincenzo M *et al*: **Elective partial nephrectomy is equivalent to radical nephrectomy in patients with clinical T1 renal cell carcinoma: results of a retrospective, comparative, multi-institutional study.** *BJU Int* 2011, **109**(7).
51. Luke J H, Kelvin H: **Renal Ablation Techniques: State of the Art.** *AJR Am J Roentgenol* 2015, **205**(4).
52. Umberto C, Francesco D, Alp T B, Ithaar D, Clara C, Antonio C, Giovanni C, Lorenzo B, Jeffrey E, Brandon W *et al*: **Percutaneous Cryotherapy and Radiofrequency Ablation of Renal Masses: Multicenter Comparative Analysis with Minimum 3-Year Follow-up.** *Int Braz J Urol* 2025, **51**(2).
53. Wu J, Sami S, Lajkosh K, Kishibe T, Ordon M: **An Updated Systematic Review and Meta-Analysis on the Technical, Oncologic, and Safety Outcomes of Microwave Ablation in Patients with Renal Cell Carcinoma.** *J Endourol* 2023, **37**(12):1314-1330.
54. Li KP, Chen SY, Wan S, Wang CY, Li XR, Yang L: **Percutaneous ablation versus robotic-assisted partial nephrectomy for cT1 renal cell carcinoma: an evidence-based analysis of comparative outcomes.** *J Robot Surg* 2024, **18**(1):301.
55. Alenezi AN, Karim O: **Role of intra-operative contrast-enhanced ultrasound (CEUS) in robotic-assisted nephron-sparing surgery.** *J Robot Surg* 2015, **9**(1):1-10.
56. Run-Qi G, Peng-Jin Z, Jie S, Yuan-Ming L: **Comparing the oncologic outcomes of local tumor destruction vs. local tumor excision vs. partial nephrectomy in T1a solid renal masses: a population-based cohort study from the SEER database.** *Int J Surg* 2024, **110**(8).

57. Chan VW, Abul A, Osman FH, Ng HH, Wang K, Yuan Y, Cartledge J, Wah TM: **Ablative therapies versus partial nephrectomy for small renal masses - A systematic review and meta-analysis.** *Int J Surg* 2022, **97**:106194.
58. Gao H, Zhou L, Zhang J, Wang Q, Luo Z, Xu Q, Tan Y, Shuai H, Zhou J, Cai X *et al*: **Comparative efficacy of cryoablation versus robot-assisted partial nephrectomy in the treatment of cT1 renal tumors: a systematic review and meta-analysis.** *BMC Cancer* 2024, **24**(1):1150.
59. Achille A, Vincenzo I, Gianluca S, Paolo C, Giovanni P, Fabrizio D, Paolo V, Celeste M, Matteo F, Francesco L *et al*: **Ablative Treatments for Small Renal Masses and Management of Recurrences: A Comprehensive Review.** *Life (Basel)* 2024, **14**(4).
60. Vincenzo I, Savio Domenico P, Roberto B, Antonio DG, Felice F, Gaetano S, Raffaele V, Angelo F, Enrico Maria A, Piercarmine P *et al*: **Robot-assisted partial nephrectomy vs. percutaneous cryoablation for T1a renal tumors: a single-center retrospective analysis of outcomes and costs.** *Int Urol Nephrol* 2024, **57**(4).

#### Figure description

Figure 1. Flow diagram of study selection process.

Figure 2. Forest plot and meta-analysis of operative time (OT) between partial nephrectomy (PN) and ablation therapy (AT).

Figure 3. Forest plot and meta-analysis of operative time (OT) between partial nephrectomy (PN) and different types of ablation therapy (AT).

Figure 4. Forest plot and meta-analysis of operative time (OT) between partial nephrectomy (PN) and different surgical approaches of ablation therapy (AT).

Figure 5. Forest plot and meta-analysis of length of stay (LOS) between partial nephrectomy (PN) and ablation therapy (AT).

Figure 6. Forest plot and meta-analysis of length of stay (LOS) between partial nephrectomy (PN) and different types of ablation therapy (AT).

Figure 7. Forest plot and meta-analysis of length of stay (LOS) between partial nephrectomy (PN) and different surgical approaches of ablation therapy (AT).

Figure 8. Forest plot and meta-analysis of Estimated blood loss (EBL) between partial nephrectomy (PN) and ablation therapy (AT).

Figure 9. Forest plot and meta-analysis of Estimated glomerular filtration rate (eGFR) between partial nephrectomy (PN) and ablation therapy (AT).

Figure 10. Forest plot and meta-analysis of Overall complication rate (OCR) between partial nephrectomy (PN) and ablation therapy (AT).

Figure 11. Forest plot and meta-analysis of Major complication rate (MCR) between partial nephrectomy (PN) and ablation therapy (AT).

Figure 12. Forest plot and meta-analysis of Major complication rate (MCR) between partial nephrectomy (PN) and different types of ablation therapy (AT).

Figure 13. Forest plot and meta-analysis of Major complication rate (MCR) between partial nephrectomy (PN) and different surgical approaches of ablation therapy (AT).

Figure 14. Forest plot and meta-analysis of Overall survival (OS) between ablation therapy (AT) and partial nephrectomy (PN).

Figure 15. Forest plot and meta-analysis of Overall survival (OS) between partial nephrectomy (PN) and different types of ablation therapy (AT).

Figure 16. Forest plot and meta-analysis of Recurrence-free survival (RFS) between partial nephrectomy (PN) and ablation therapy (AT).

Figure 17. Forest plot and meta-analysis of Recurrence-free survival (RFS) between partial nephrectomy (PN) and different types of ablation therapy (AT).

Figure 18. Forest plot and meta-analysis of Recurrence-free survival (RFS) between partial nephrectomy (PN) and different surgical approaches of ablation therapy (AT).

Figure 19. Forest plot and meta-analysis of Cancer-specific survival (CSS) between partial nephrectomy (PN) and ablation therapy (AT).

Accepted Manuscript



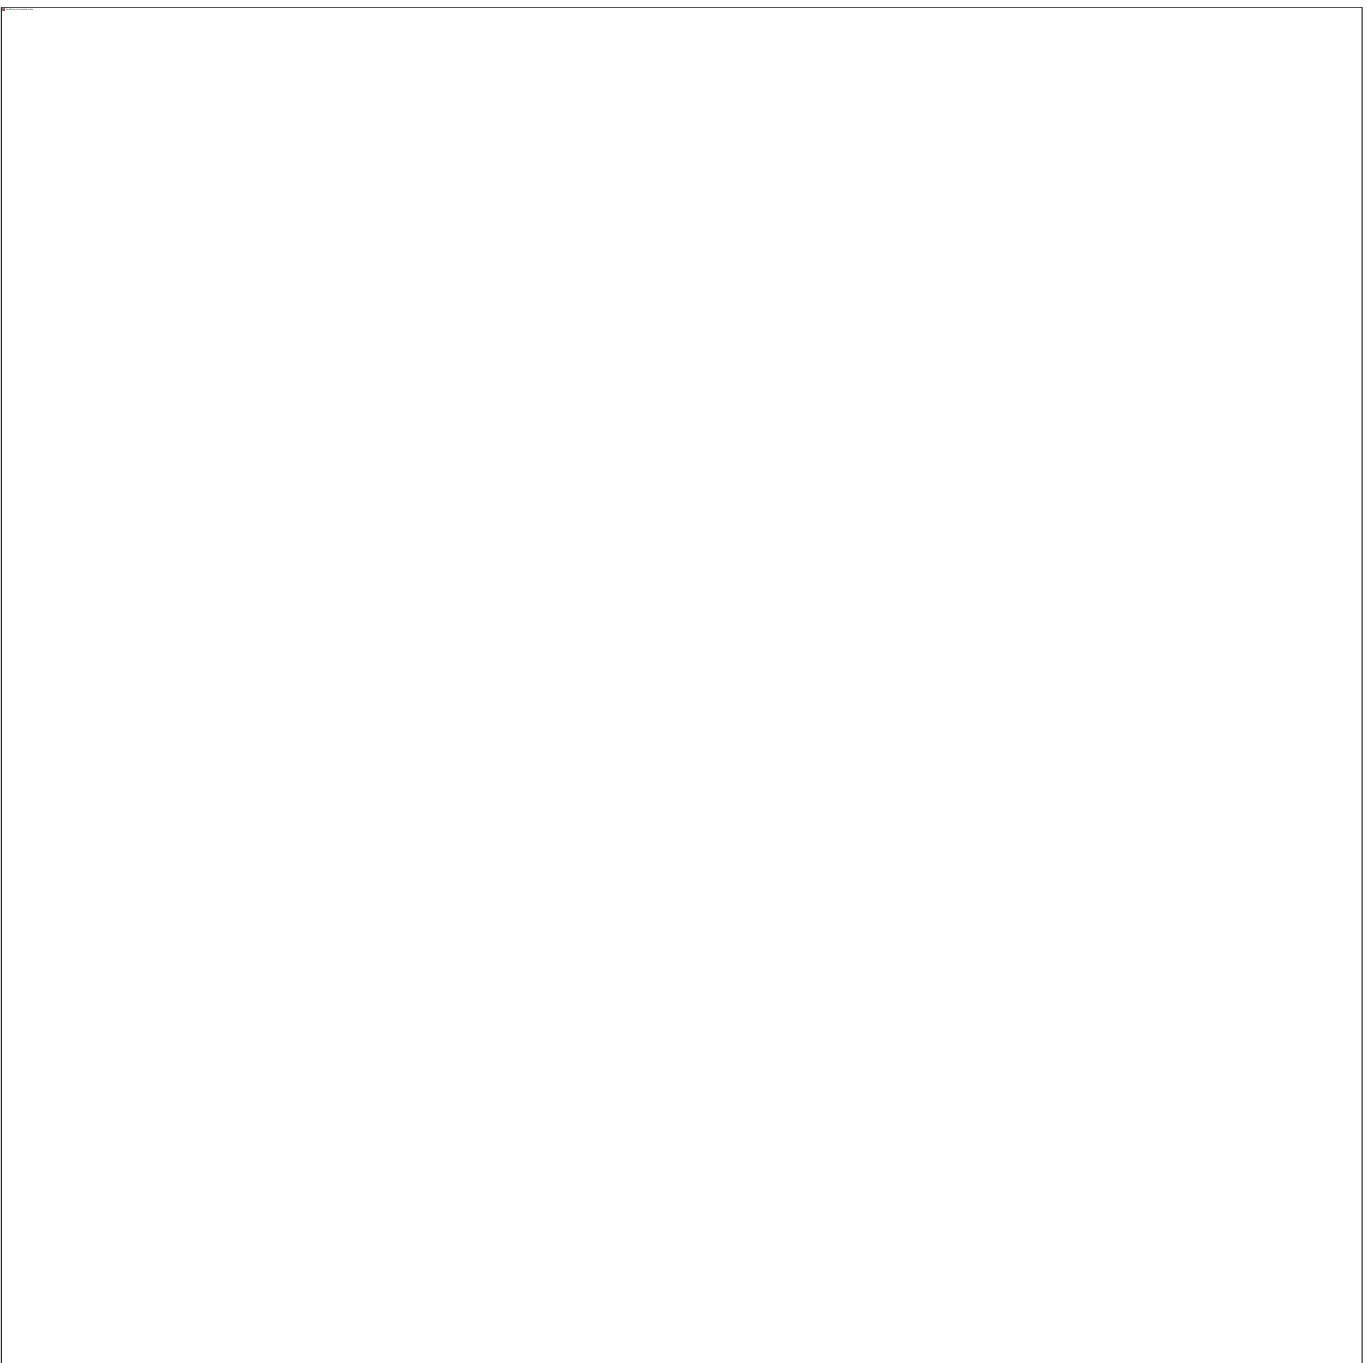

Accepted



Accepted

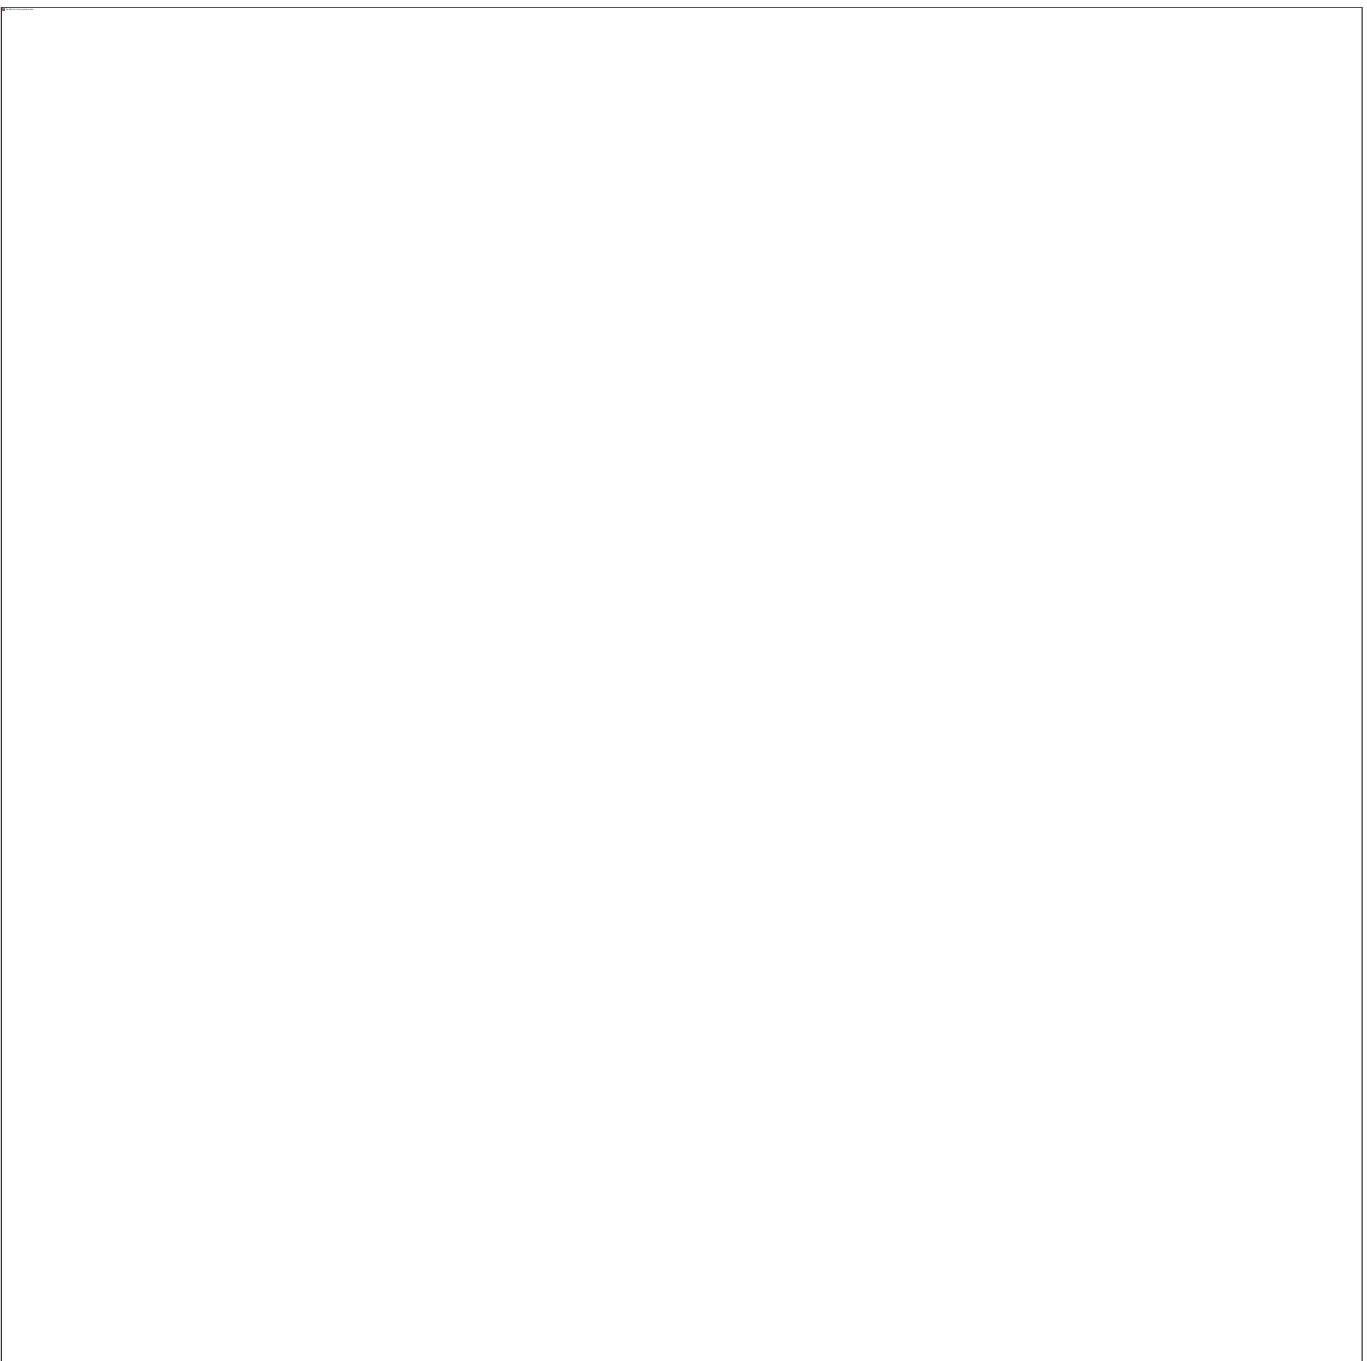

Accepted



Accepted



Accepted



Accepted



Accepted



Accepted





Accepted

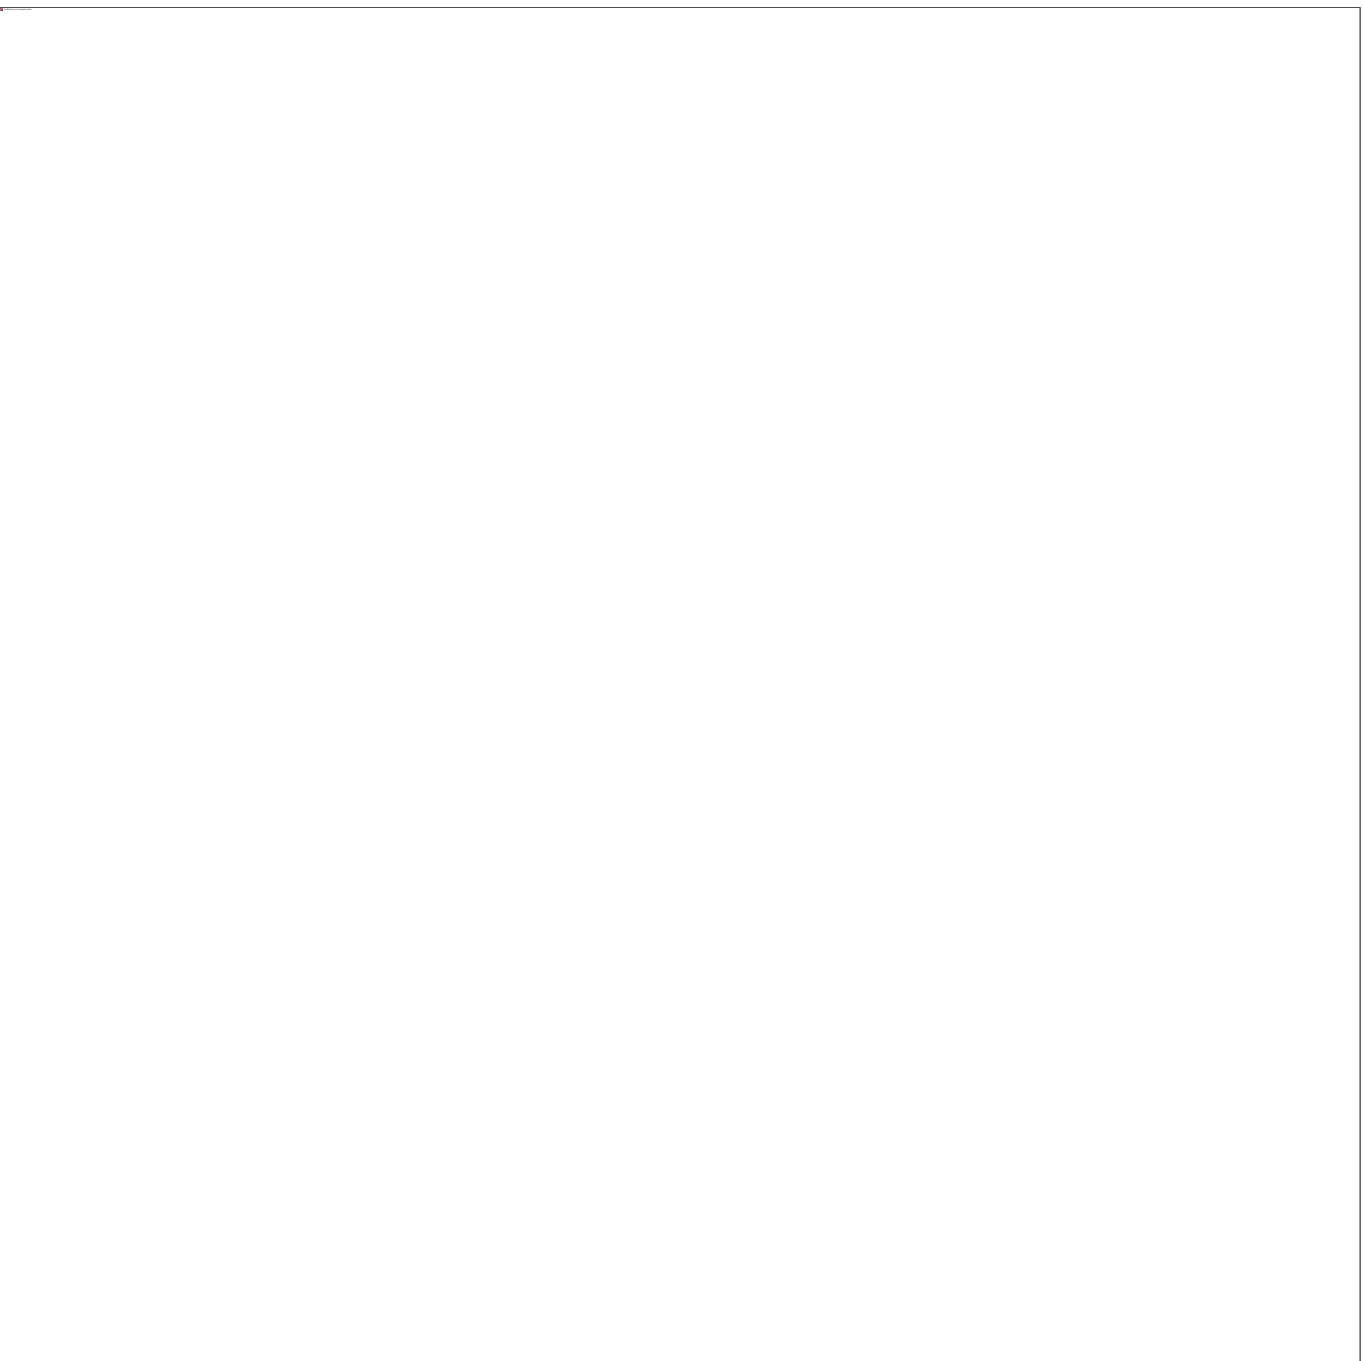

Accepted



Accepted



Accepted



Accepted



Accepted



Accepted



Accepted





Accepted



Accepted

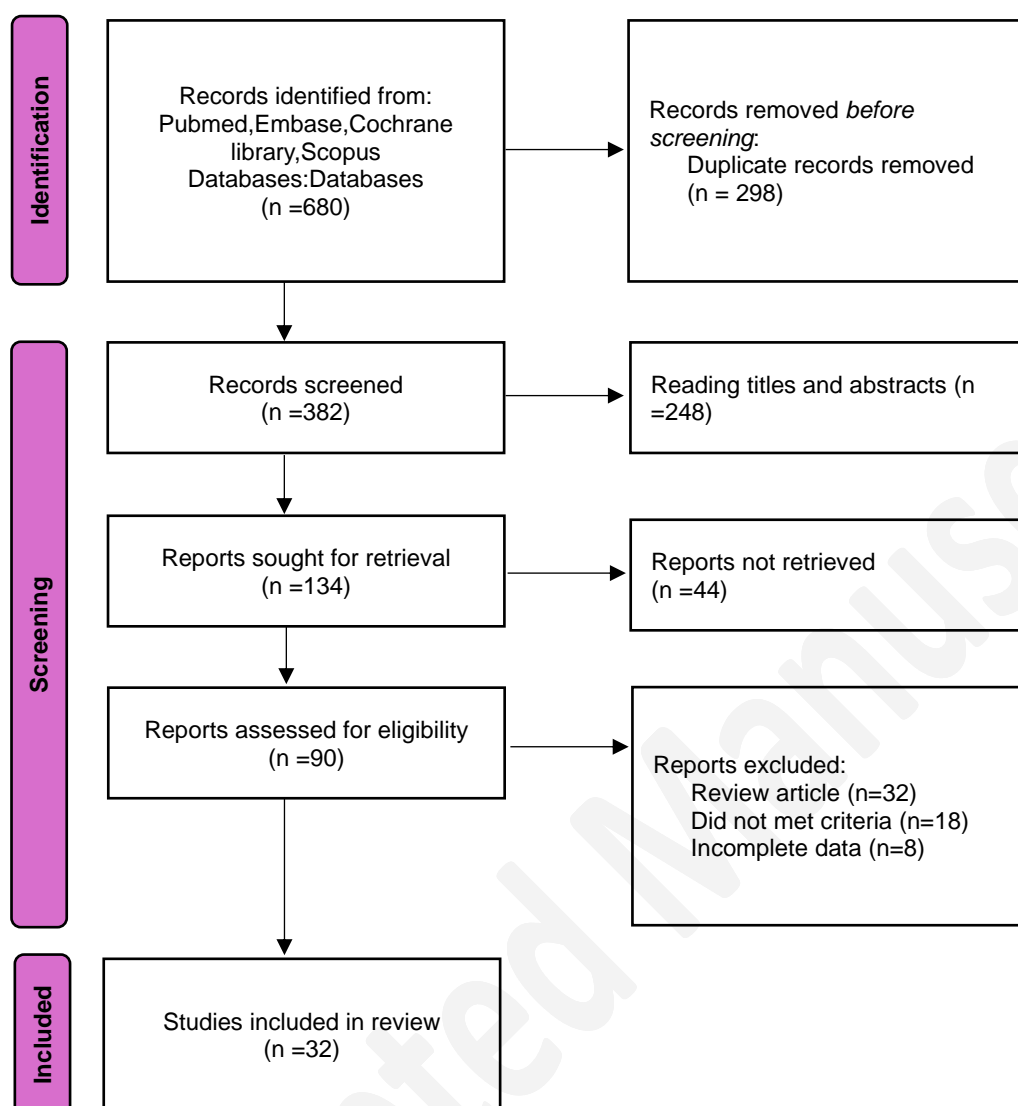

| Table1 Baseline data for studies included in the meta-analysis |      |                     |                         |           |       |            |                |                                     |
|----------------------------------------------------------------|------|---------------------|-------------------------|-----------|-------|------------|----------------|-------------------------------------|
| Author                                                         | Year | Study Type          | Sample<br>(PN/Ablation) | Age       | Stage | BMI(kg/m2) | Tumer Size(cm) | Operative methods                   |
| Bensalah et al. <sup>[12]</sup>                                | 2007 | Retrospective Study | 40/14                   | 56.5/62   | T1a   | 31.1/29.6  | 2.6/2.3        | LPN <sup>c</sup> /LRFA <sup>d</sup> |
| Huang et al. <sup>[13]</sup>                                   | 2016 | RCT                 | 45/44                   | 52/ 51    | T1a   | 24.4/24.8  | 3.0/2.65       | LPN/LRFA                            |
| Ji et al. <sup>[14]</sup>                                      | 2016 | Retrospective Study | 74/105                  | 57.3/64.2 | T1a   | NA         | 2.9/2.2        | LPN/LRFA                            |
| GUAN et al. <sup>[15]</sup>                                    | 2012 | Retrospective Study | 54/48                   | 46.4/45.5 | T1a   | 23.1/23/5  | 2.8/3.1        | PN/MWA <sup>e</sup>                 |
| Jong Park et al. <sup>[16]</sup>                               | 2019 | Retrospective Study | 53/62                   | 53/58     | T1a   | 24.9/26    | 2.75/2.14      | LPN/LRFA                            |
| Ruiz et al. <sup>[17]</sup>                                    | 2018 | Retrospective Study | 49/84                   | 63/66     | T1    | NA         | 3.2/2.6        | LPN/LRFA                            |
| Yu et al. <sup>[18]</sup>                                      | 2020 | Retrospective Study | 185/185                 | 50.9/63.2 | T1a   | NA         | 2.3/2.3        | LPN/PMWA                            |
| Anglickis et al. <sup>[19]</sup>                               | 2019 | Retrospective Study | 18/15                   | 71.5/75   | T1    | 25/25      | 3/3.2          | OPN <sup>f</sup> /PMWA              |
| Kim et al. <sup>[31]</sup>                                     | 2014 | Retrospective Study | 27/27                   | 25.9/26.6 | T1-3  | 25.9/26.6  | 1.77/1.8       | RALPN <sup>g</sup> /PRFA            |
| Chung et al. <sup>[32]</sup>                                   | 2022 | Retrospective Study | 46/39                   | 59.4/61.6 | T1a   | NA         | 2.4/2.2        | LPN/PRFA                            |
| Stern et al. <sup>[44]</sup>                                   | 2007 | Retrospective Study | 37/40                   | 56.4/60.5 | T1a   | NA         | 2.43/2.41      | PN/RFA                              |
| Pantelidou et al. <sup>[33]</sup>                              | 2015 | Retrospective Study | 63/63                   | 54/61     | T1    | NA         | 2.88/2.11      | RALPN/PRFA                          |
| Cazalas et al. <sup>[36]</sup>                                 | 2023 | Retrospective Study | 75/75                   | 61.1/76.9 | T1b   | 27.9/30.5  | NA             | RALPN/PTA <sup>h</sup>              |
| KleiN et al. <sup>[35]</sup>                                   | 2023 | Retrospective Study | 112/86                  | 60.7/70.3 | T2b   | 27.9/29.6  | NA             | RALPN/PTA                           |
| Lehrer et al. <sup>[22]</sup>                                  | 2023 | Retrospective Study | 142/66                  | 79/80.4   | T1    | 26.8/27.1  | 3.2/2.7        | RPN/PTA                             |
| MD et al. <sup>[28]</sup>                                      | 2023 | Retrospective Study | 60/92                   | 56.4/63.4 | T1    | 28/28      | NA             | RAPN/PTA                            |

|                                               |      |                     |          |             |       |            |           |                      |
|-----------------------------------------------|------|---------------------|----------|-------------|-------|------------|-----------|----------------------|
| <b>Chlorogiannis et al.</b> <sup>[46]</sup>   | 2024 | Retrospective Study | 87/71    | 56/70       | T1    | NA         | 3.2/3.0   | RPN/PMWA             |
| <b>Qiu et al.</b> <sup>[47]</sup>             | 2023 | Retrospective Study | 80/126   | 54/67       | T1a   | NA         | 3.4/3.5   | PN/MWA               |
| <b>Kula et al.</b> <sup>[21]</sup>            | 2024 | Retrospective Study | 55/55    | 56/64       | T1a   | NA         | 3.0/2.3   | LPN/MWA              |
| <b>Lucignani et al.</b> <sup>[20]</sup>       | 2023 | Retrospective Study | 109/62   | 65/73       | T1    | 25/26      | NA        | RAPN/MWA             |
| <b>Pedraza-Sánchez et al.</b> <sup>[34]</sup> | 2023 | Retrospective Study | 180/111  | 57.47/64.49 | T1    | NA         | 3.2/2.1   | PN/PRFA              |
| <b>Haramis et al.</b> <sup>[37]</sup>         | 2012 | Retrospective Study | 92/75    | 58.8/69.2   | T1a   | NA         | 1.9/2.0   | LPN/LCA <sup>i</sup> |
| <b>Lin et al.</b> <sup>[38]</sup>             | 2008 | Retrospective Study | 14/13    | 58/69       | T1a   | 28.1/25.9  | 3.6/2.5   | LPN/LCA              |
| <b>Liu et al.</b> <sup>[39]</sup>             | 2021 | Retrospective Study | 55/55    | 52.3/69.4   | T1-T2 | 25.29/25.0 | 4.06/3.86 | RAPN/LCA             |
| <b>Malley et al.</b> <sup>[40]</sup>          | 2006 | Retrospective Study | 15/15    | 75.7/76.1   | T1    | 27.1/29.1  | 2.5/2.7   | LPN/LCA              |
| <b>Guillotreau et al.</b> <sup>[41]</sup>     | 2012 | Retrospective Study | 210/226  | 57.8/67.4   | T1    | 30.1/29.3  | 2.4/2.2   | RPN/LCA              |
| <b>Fraisse et al.</b> <sup>[48]</sup>         | 2017 | Retrospective Study | 177/177  | 59.9/69.9   | T1    | 26.4/27.9  | 2.8/2.6   | RPN/LCA              |
| <b>Yanagisawa et al.</b> <sup>[26]</sup>      | 2020 | Retrospective Study | 90/90    | 69.5/68.5   | T1    | NA         | 2.9/2.8   | LPN/PCA              |
| <b>Haber et al.</b> <sup>[27]</sup>           | 2011 | Retrospective Study | 48/30    | 60.6/60.9   | T2    | 30.1/31.5  | 3.2/2.6   | LPN/PCA              |
| <b>Uemura et al.</b> <sup>[45]</sup>          | 2021 | Retrospective Study | 78/48    | 61/78       | T1    | 23/23      | NA        | RAPN/PCA             |
| <b>Pandolfo et al.</b> <sup>[43]</sup>        | 2022 | Retrospective Study | 50/119   | 65/61       | T1    | 26.6/29.6  | NA        | RAPN/PTA             |
| <b>Millan et al.</b> <sup>[49]</sup>          | 2022 | Retrospective Study | 2001/275 | 60/67       | T1    | NA         | 2.6/2.6   | PN/TA                |

Table 2 Quality score of included studies based on the NOS scale

| Study                             | Selection        |                   | Comparability   |                 |                 |                 | Exposure        |                 |                  | Total stars |
|-----------------------------------|------------------|-------------------|-----------------|-----------------|-----------------|-----------------|-----------------|-----------------|------------------|-------------|
|                                   | <sup>a</sup> REC | <sup>b</sup> SNEC | <sup>c</sup> AE | <sup>d</sup> DO | <sup>e</sup> SC | <sup>f</sup> AF | <sup>g</sup> AO | <sup>h</sup> FU | <sup>i</sup> AFU |             |
| Bensalah et al. <sup>[5]</sup>    | 1                | 1                 | 1               |                 | 1               | 1               | 1               | 1               |                  | 7           |
| Huang et al. <sup>[6]</sup>       | 1                | 1                 | 1               | 1               | 1               |                 | 1               |                 | 1                | 7           |
| Ji et al. <sup>[7]</sup>          | 1                | 1                 | 1               | 1               | 1               |                 |                 | 1               | 1                | 7           |
| GUAN et al. <sup>[8]</sup>        | 1                | 1                 | 1               | 1               |                 |                 | 1               | 1               | 1                | 7           |
| Jong Park et al. <sup>[9]</sup>   | 1                | 1                 | 1               | 1               |                 | 1               | 1               | 1               |                  | 7           |
| Ruiz et al. <sup>[10]</sup>       | 1                | 1                 | 1               | 1               |                 |                 |                 | 1               | 1                | 6           |
| Yu et al. <sup>[11]</sup>         | 1                | 1                 | 1               | 1               | 1               | 1               | 1               |                 |                  | 7           |
| Anglickis et al. <sup>[12]</sup>  | 1                | 1                 | 1               | 1               |                 |                 |                 | 1               | 1                | 6           |
| Kim et al. <sup>[23]</sup>        | 1                | 1                 | 1               | 1               | 1               |                 |                 | 1               | 1                | 7           |
| Chung et al. <sup>[24]</sup>      | 1                | 1                 | 1               |                 | 1               |                 | 1               | 1               | 1                | 7           |
| Stern et al. <sup>[44]</sup>      | 1                | 1                 | 1               |                 |                 | 1               | 1               | 1               | 1                | 7           |
| Pantelidou et al. <sup>[25]</sup> | 1                | 1                 | 1               |                 | 1               | 1               | 1               | 1               | 1                | 8           |
| Cazalas et al. <sup>[28]</sup>    | 1                | 1                 | 1               | 1               | 1               |                 | 1               |                 | 1                | 7           |
| KleiN et al. <sup>[27]</sup>      | 1                | 1                 | 1               | 1               | 1               |                 |                 | 1               | 1                | 7           |

|                                               |   |   |   |   |   |   |   |   |   |   |
|-----------------------------------------------|---|---|---|---|---|---|---|---|---|---|
| <b>Lehrer et al.</b> <sup>[15]</sup>          | 1 | 1 | 1 | 1 |   |   | 1 | 1 | 1 | 7 |
| <b>MD et al.</b> <sup>[21]</sup>              | 1 | 1 | 1 | 1 |   | 1 | 1 | 1 |   | 7 |
| <b>Chlorogiannis et al.</b> <sup>[46]</sup>   | 1 | 1 | 1 | 1 |   |   |   | 1 | 1 | 6 |
| <b>Qiu et al.</b> <sup>[38]</sup>             | 1 | 1 | 1 | 1 | 1 | 1 | 1 |   |   | 7 |
| <b>Kula et al.</b> <sup>[14]</sup>            | 1 | 1 | 1 | 1 |   |   |   | 1 | 1 | 6 |
| <b>Lucignani et al.</b> <sup>[13]</sup>       | 1 | 1 | 1 | 1 | 1 |   |   | 1 | 1 | 7 |
| <b>Pedraza-Sánchez et al.</b> <sup>[26]</sup> | 1 | 1 | 1 |   | 1 |   | 1 | 1 | 1 | 7 |
| <b>Haramis et al.</b> <sup>[29]</sup>         | 1 | 1 | 1 |   |   | 1 | 1 | 1 | 1 | 7 |
| <b>Lin et al.</b> <sup>[30]</sup>             | 1 | 1 | 1 |   | 1 | 1 |   | 1 | 1 | 7 |
| <b>Liu et al.</b> <sup>[31]</sup>             | 1 | 1 | 1 |   |   | 1 | 1 | 1 |   | 6 |
| <b>Malley et al.</b> <sup>[32]</sup>          | 1 | 1 | 1 |   | 1 | 1 | 1 |   | 1 | 7 |
| <b>Guillotreau et al.</b> <sup>[33]</sup>     | 1 | 1 | 1 | 1 | 1 |   | 1 |   |   | 6 |
| <b>Fraisse et al.</b> <sup>[39]</sup>         | 1 | 1 | 1 |   |   | 1 |   | 1 | 1 | 6 |
| <b>Yanagisawa et al.</b> <sup>[19]</sup>      | 1 | 1 | 1 |   | 1 | 1 | 1 | 1 | 1 | 8 |
| <b>Haber et al.</b> <sup>[20]</sup>           | 1 | 1 | 1 |   | 1 |   |   | 1 | 1 | 7 |
| <b>Uemura et al.</b> <sup>[37]</sup>          | 1 | 1 | 1 |   | 1 |   | 1 | 1 |   | 6 |
| <b>Pandolfo et al.</b> <sup>[35]</sup>        | 1 | 1 | 1 |   | 1 |   | 1 | 1 |   | 6 |

|                               |   |   |   |   |   |   |   |   |
|-------------------------------|---|---|---|---|---|---|---|---|
| Millan et al. <sup>[40]</sup> | 1 | 1 | 1 | 1 | 1 | 1 | 1 | 7 |
|-------------------------------|---|---|---|---|---|---|---|---|

<sup>a</sup>REC, representativeness of the cohort; <sup>b</sup>SNEC, selection of the none posed cohort; <sup>c</sup>AE, ascertainment of exposure; <sup>d</sup>DO, demonstration that outcome of interest was not present at start of study; <sup>e</sup>SC, study controls most important factors; <sup>f</sup>AF, study controls for other important factors; <sup>g</sup>AO, assessment of outcome; <sup>h</sup>FU, follow-up long enough for outcomes to occur; <sup>i</sup>AFU, adequacy of follow-up of cohort (≥ 80%).

Accepted Manuscript
